# Supplementary material for: Update on the current opinion, status and future development of digital pathology in Switzerland in light of COVID-19
Source: HighWire-hosted journal article supplement (doi:10.1136/jclinpath-2021-207768), 2021-09-13

The COVID-19 pandemic and its associated lockdown has invigorated debate regarding the digitalization of pathologist workplaces and home offices. The Swiss Digital Pathology Consortium (SDiPath, [sdipath.ch](http://sdipath.ch)) needs your help to assess the practice, safety, and validity of the use of a “home office” scenario.

If you plan to, or are currently using, remote sign-out, please participate in the following brief survey. Your experience will help craft federal responses for the promotion of the safe and effective use of this technology beyond the current pandemic. We appreciate your time and look forward to the productive engagement of all pathologists, laboratory and IT professional staff, for the collection of critical real-world data.

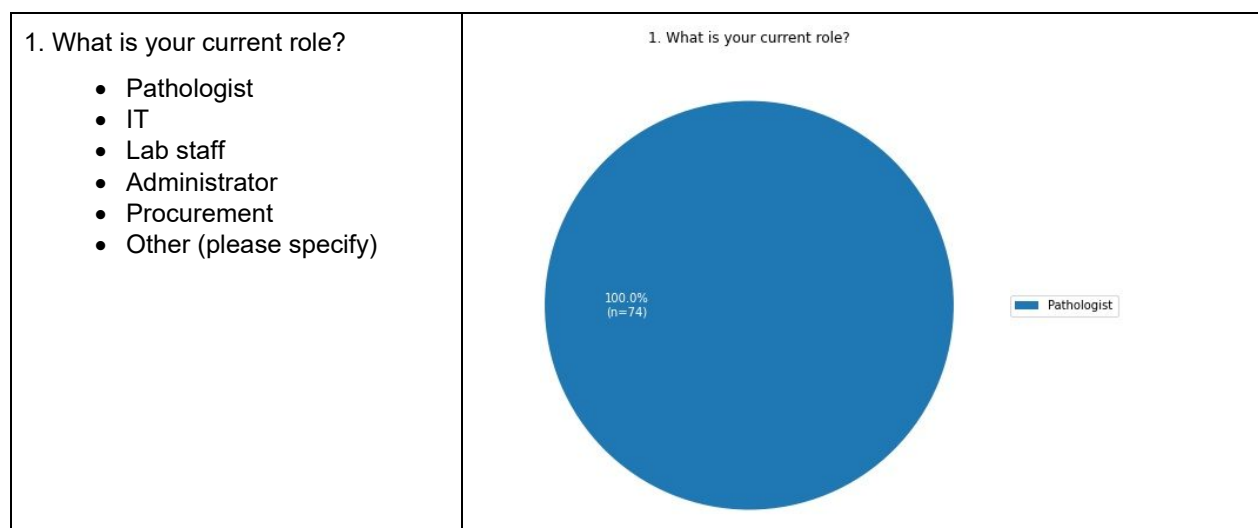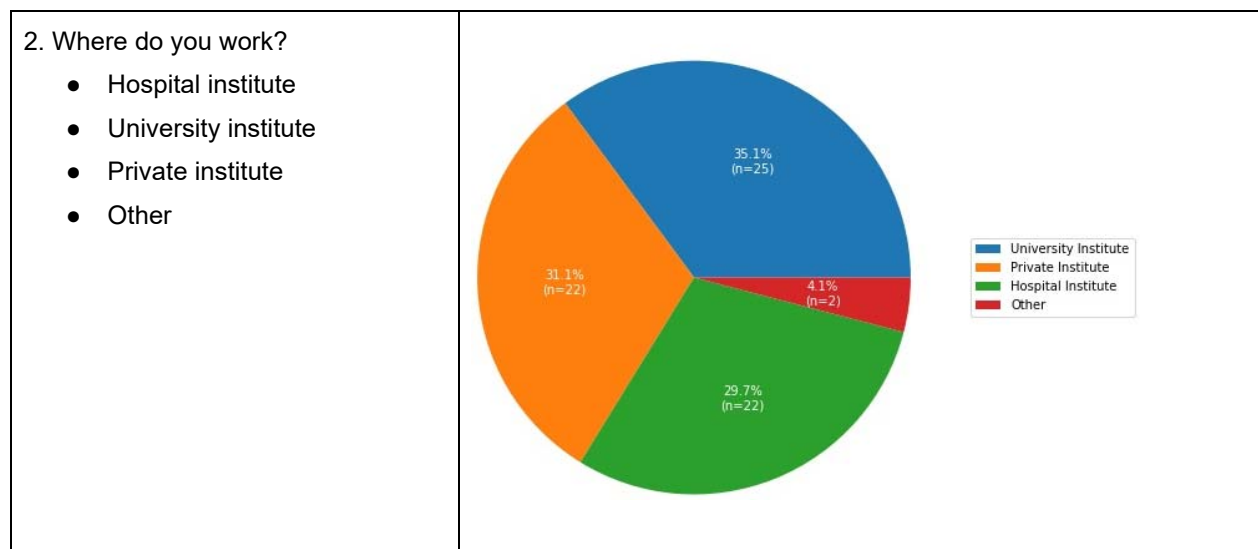

3. How many years have you been practicing (MDs) /involved with (lab staff) pathology?

- Up to 5 years
- 5-10 years
- 10-20 years
- More than 20 years

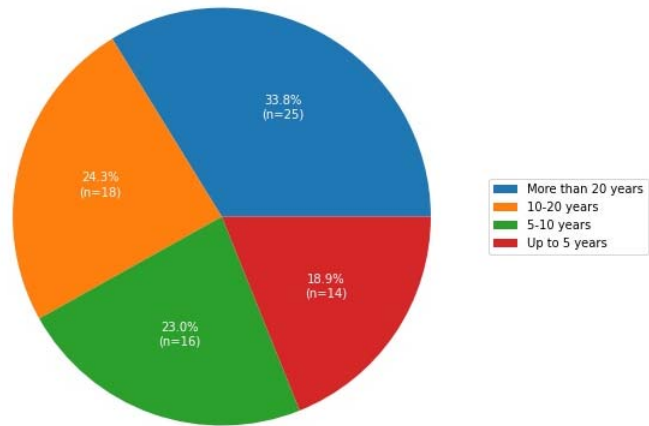

4. How many slides have you read digitally in your career so far in a clinical diagnostics context?

- 0
- 1-100
- 100-1000
- 1000-10000
- > 10000

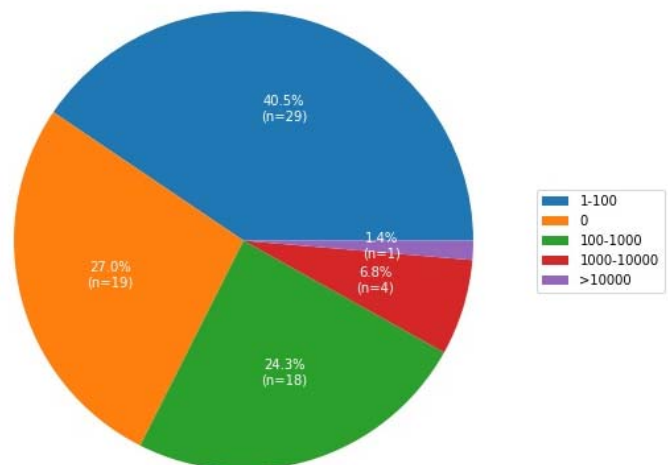

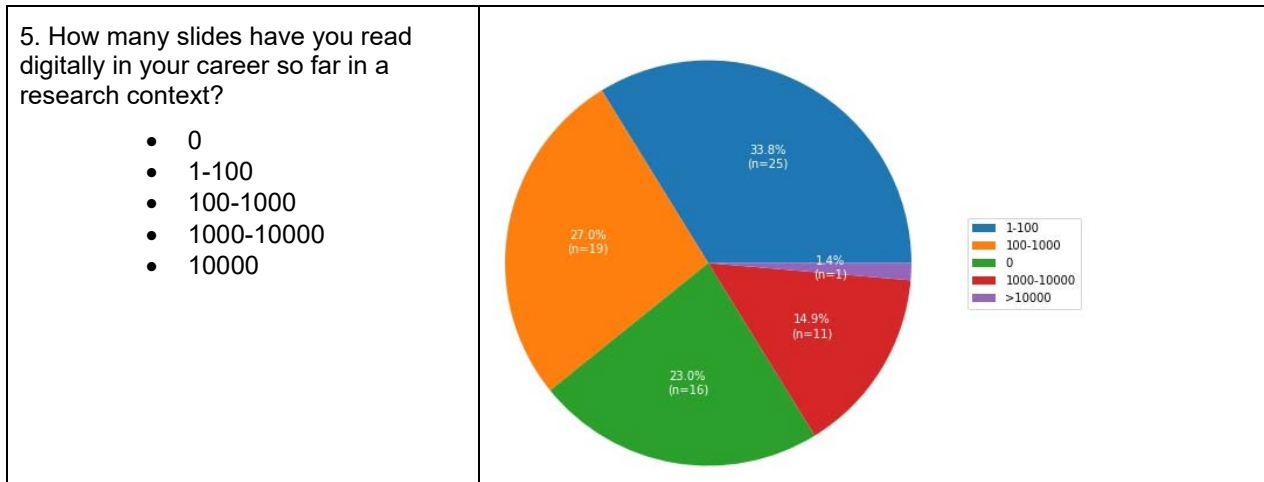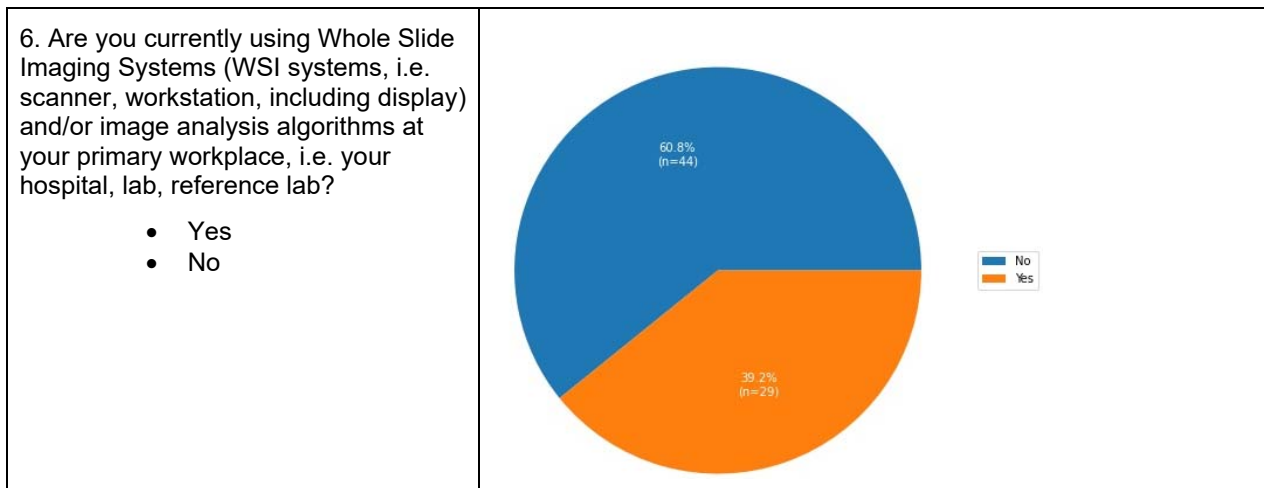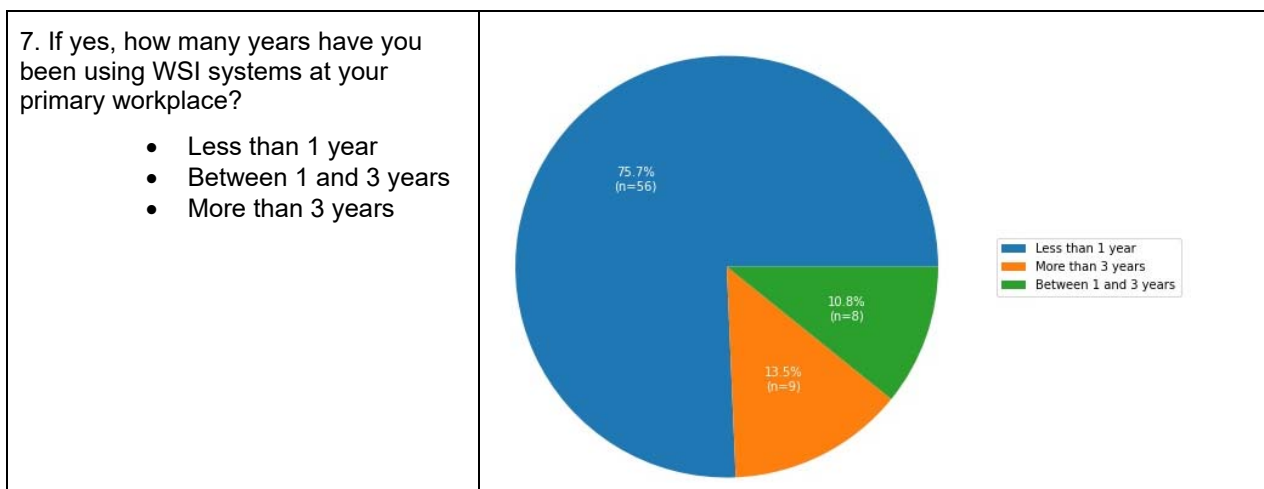

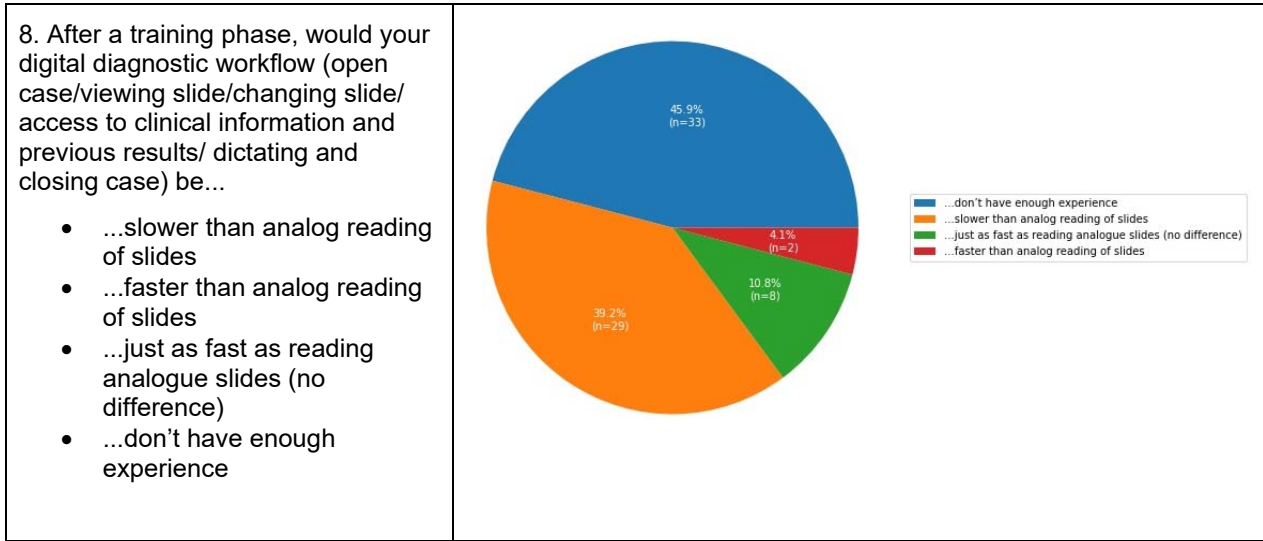

9. Before the COVID lockdown, what WSI use cases were you using at your institution in the last 6 months? (Please select all that apply)
- Primary Diagnosis
  - External Consult, i.e. second opinion
  - Internal Consults, i.e. collaboration and or seeking colleague's expert opinion on a case before signing out
  - QC, e.g. check on batch controls, image quality, etc.
  - QA, e.g. correlation between frozen section and Primary Diagnosis (PDx), one pathologist confirming PDx of prior PDx, etc.
  - Education
  - Tumor Boards
  - Research
  - Image Analysis, such as breast markers, MMR
  - Other (please specify)

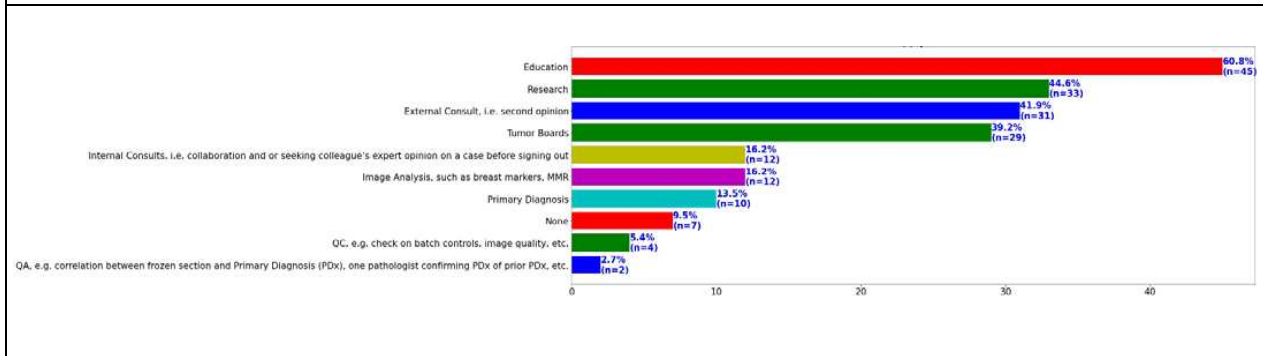

10. Before the COVID-19 lockdown, please identify which of the following products were used by your pathology system at your lab/hospital.

- Scanner
- Viewing Software
- Image Management Software (IMS)
- Lab Information System (LIS)

10. Before the COVID-19 lockdown, please identify which of the following products were used by your pathology system at your lab/hospital. [Scanner]

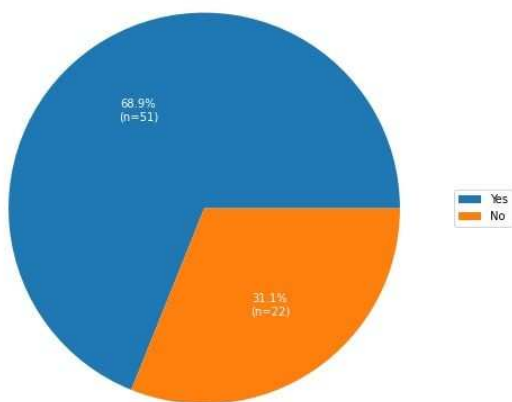

10. Before the COVID-19 lockdown, please identify which of the following products were used by your pathology system at your lab/hospital. [Viewing Software]

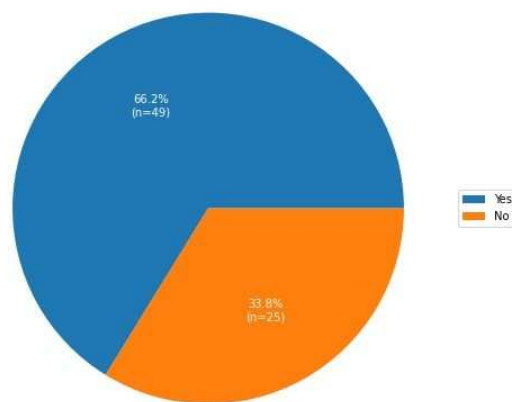

10. Before the COVID-19 lockdown, please identify which of the following products were used by your pathology system at your lab/hospital. [Image Management Software (IMS)]

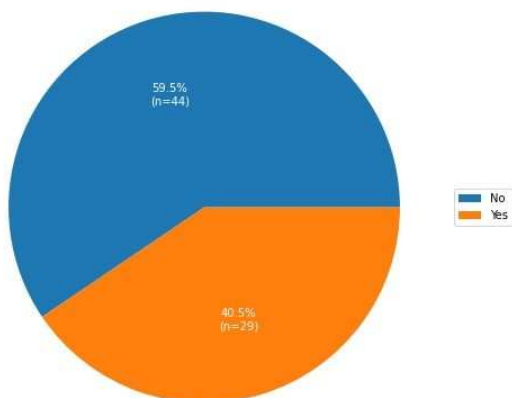

10. Before the COVID-19 lockdown, please identify which of the following products were used by your pathology system at your lab/hospital. [Lab Information System (LIS)]

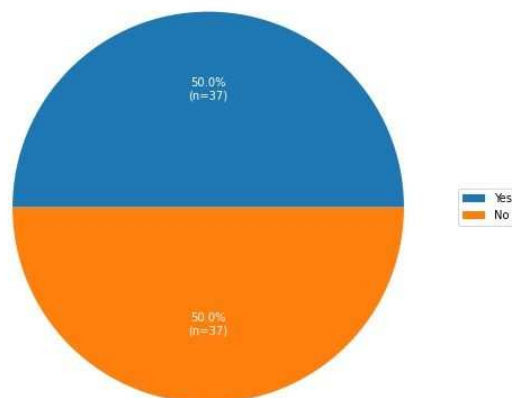

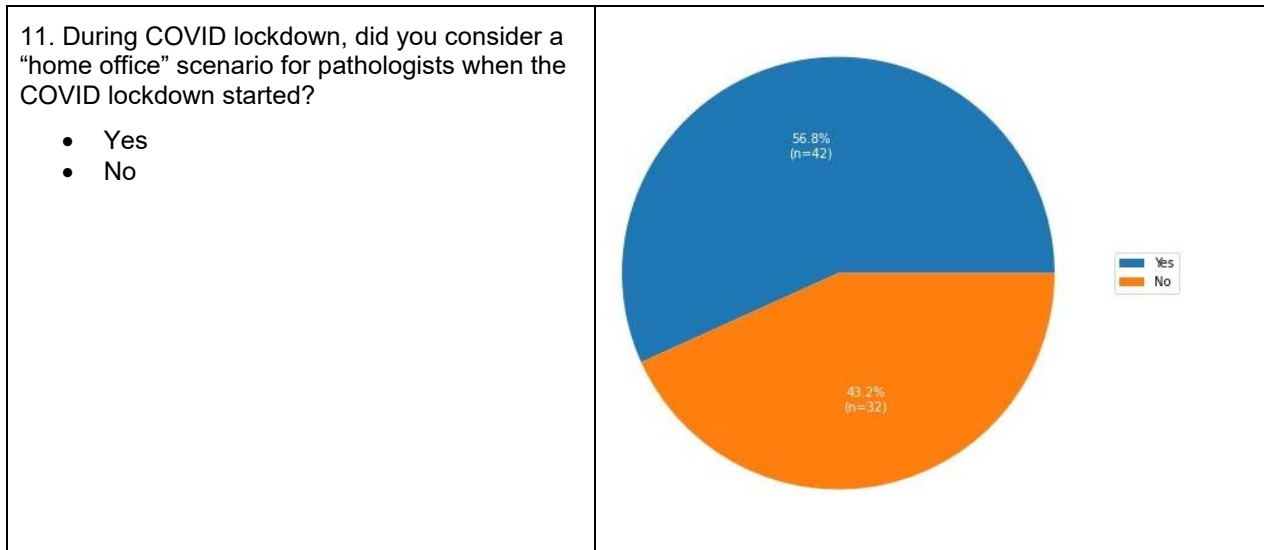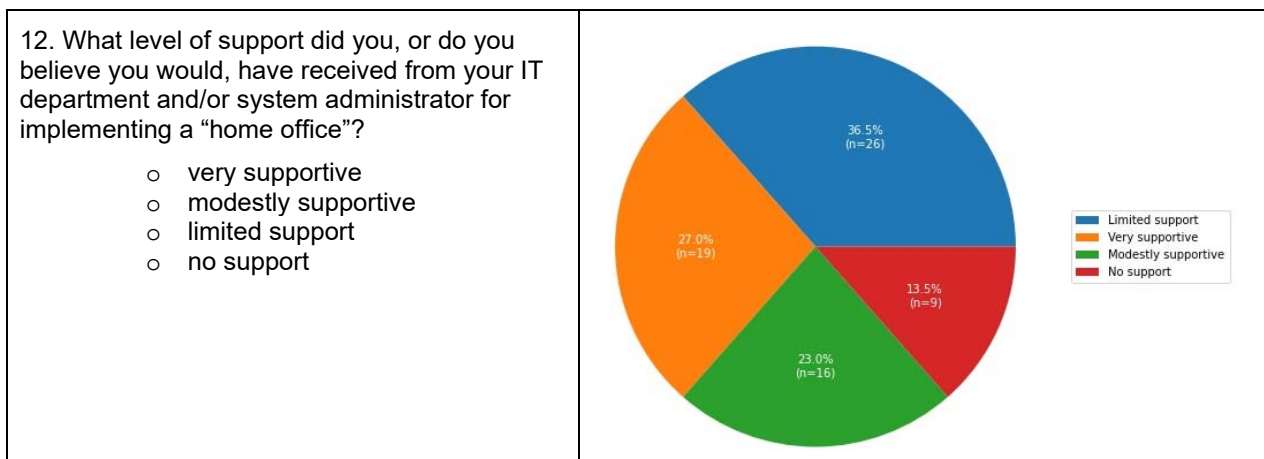

13. Did you require material or set-up changes to components of the Whole Slide Image System to enable "home office" during COVID lockdown?

Yes (Please select all that apply)

- a. Scanner
- b. Monitor
- c. Viewing Software
- d. VPN or Network Connection
- e. Other (please specify) [text response]

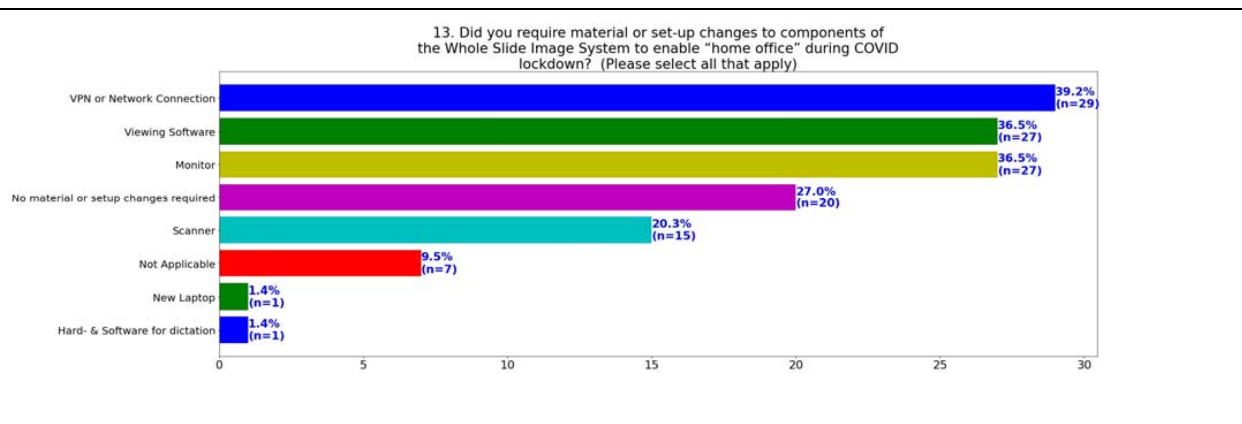

14. During the COVID lockdown, were you remotely signing out cases (Please select all that apply)?

- a. Yes, for
  - i. Primary Diagnosis
  - ii. External Consult, i.e. second opinion
  - iii. Internal Consults, i.e. collaboration and or seeking colleague's expert opinion on a case before signing out
  - iv. Research
  - v. Image Analysis (such as breast markers, MMR...)
- b. Not signing out cases

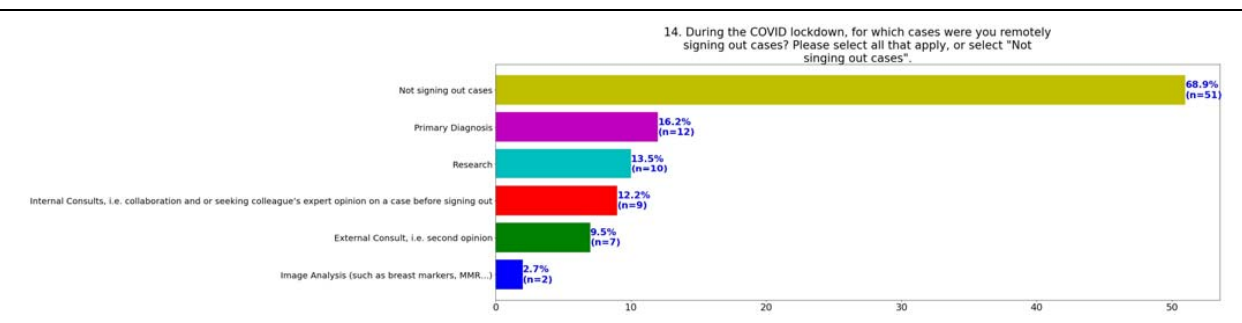

14 a. Subgroup analysis of use cases for pathologists remotely signing out cases during the COVID lockdown:

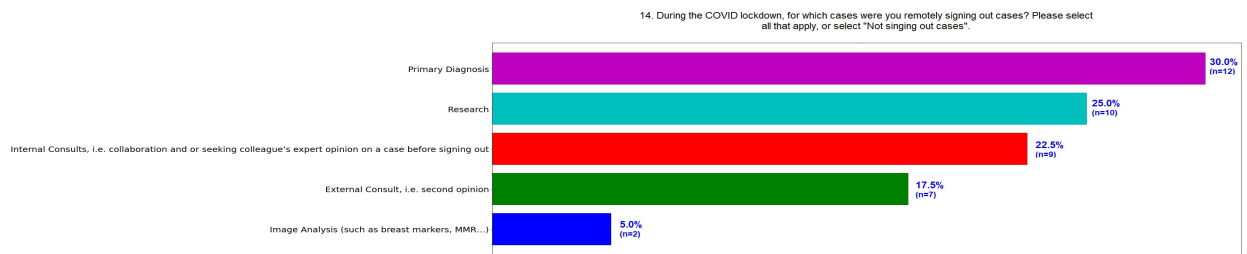

15. If no, what was preventing you from implementing remote sign out (multiple answers possible)?

- Insufficient hardware at remote site
- Insufficient network connection
- Uncomfortable with the situation/fear of misdiagnosis
- Workplace environment is missing (closeness to lab/colleagues/bibliography)
- Concerns about data privacy / safety
- No digital workflow set up
- Other reason, please specify [text box]
- 

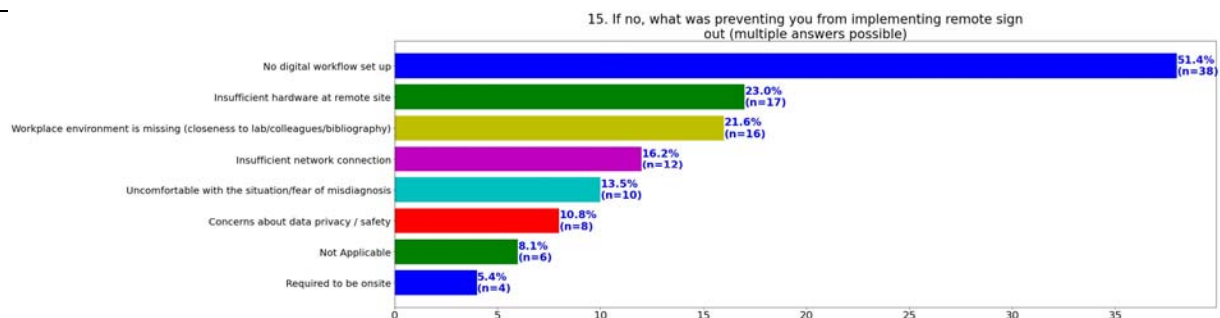



16. If diagnosing remotely ("home office"), how did (or would) you transmit your report into your Lab Information System (LIS) ?

- Remote connection to dictation tool of the LIS
- Generated speech file and sent to dictation pool
- Wrote the report by myself
- Other: [text]

16. If diagnosing remotely ("home office"), how did (or would) you transmit your report into your Lab Information System (LIS) ?

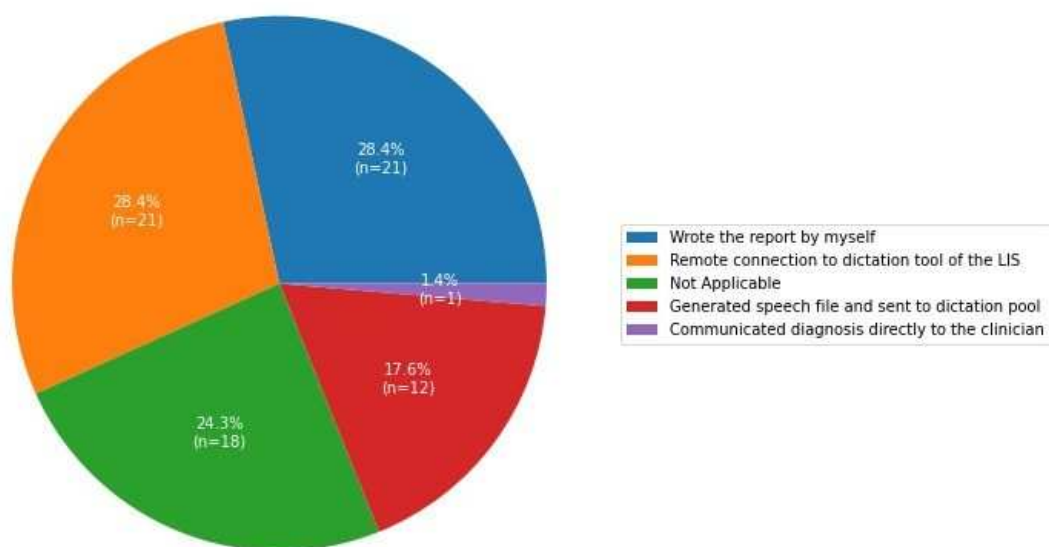

17. Did your institution change procedure(s) to access the clinical patient information during remote use such as how you access or integrate with the electronic medical record or the laboratory information system?

- Yes
- No

17. Did your institution change procedure(s) to access the clinical patient information during remote use such as how you access or integrate with the electronic medical record or the laboratory information system?

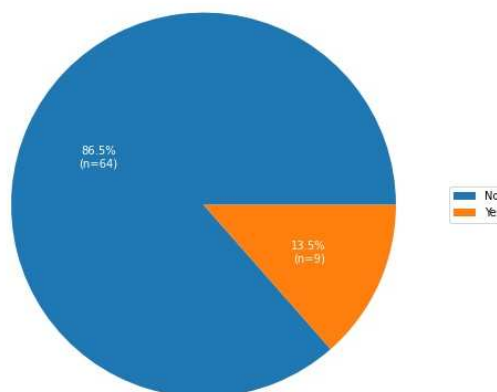

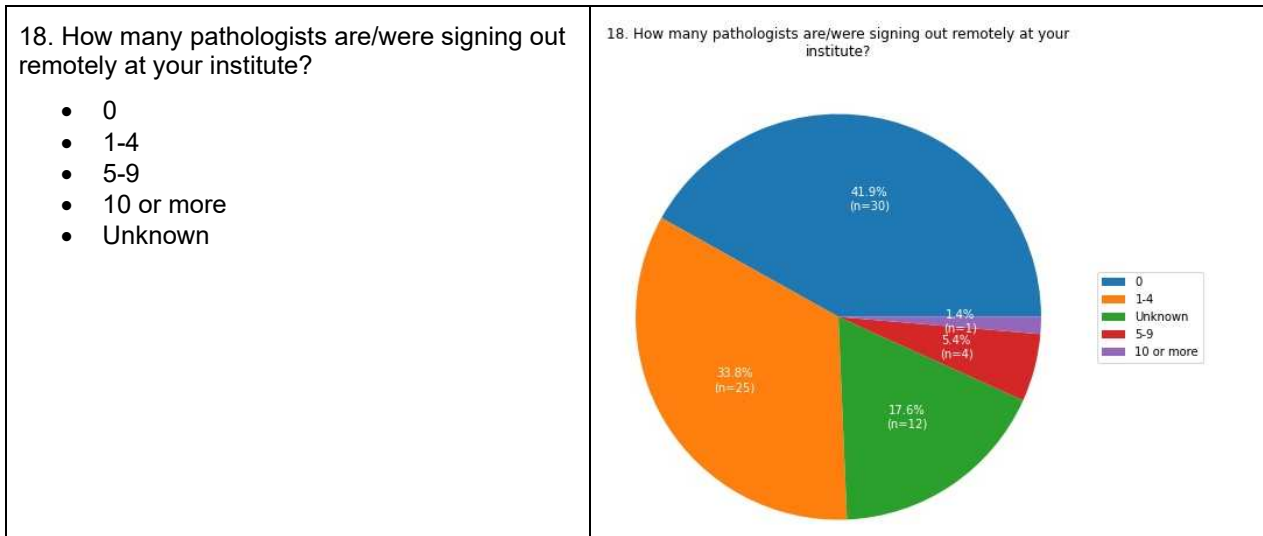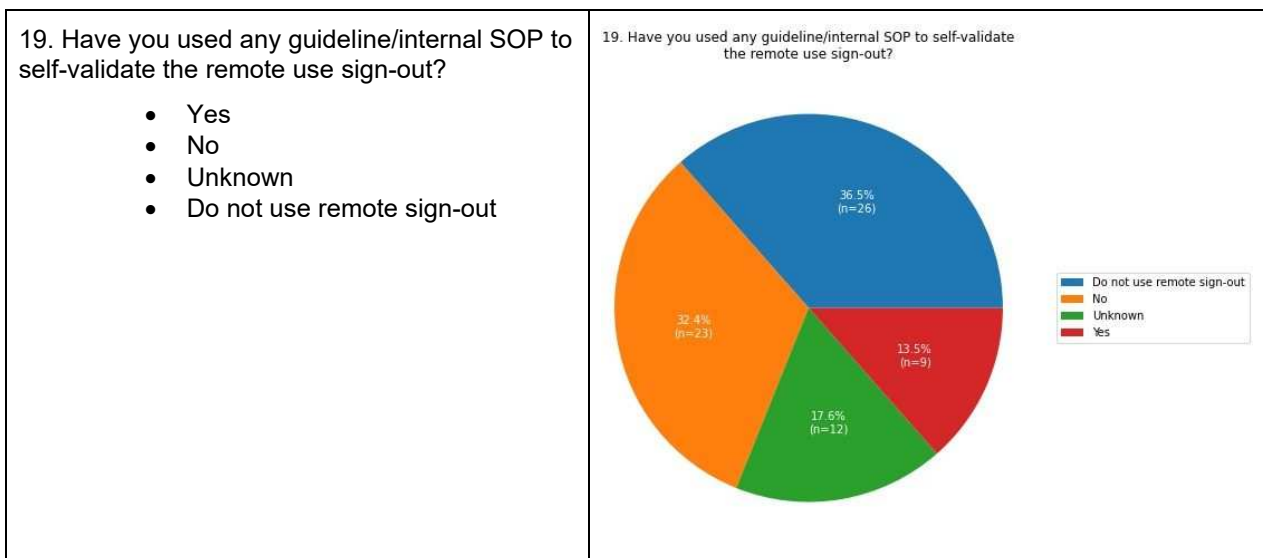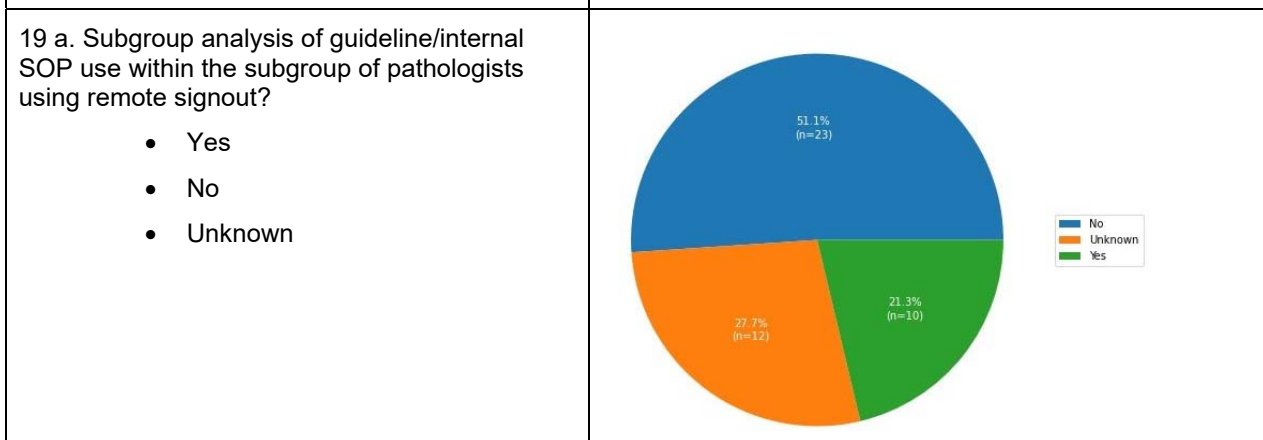

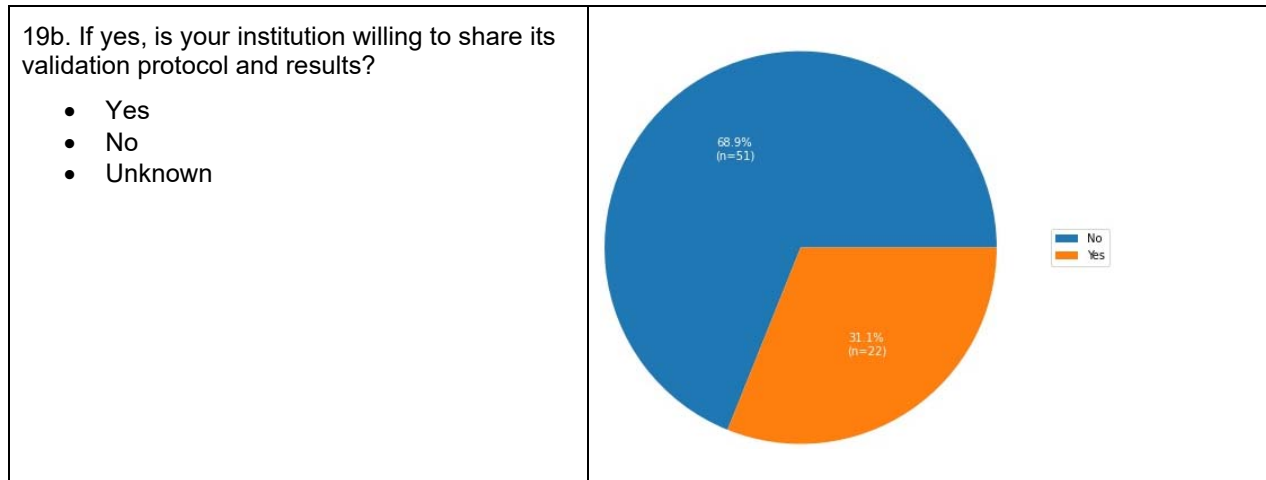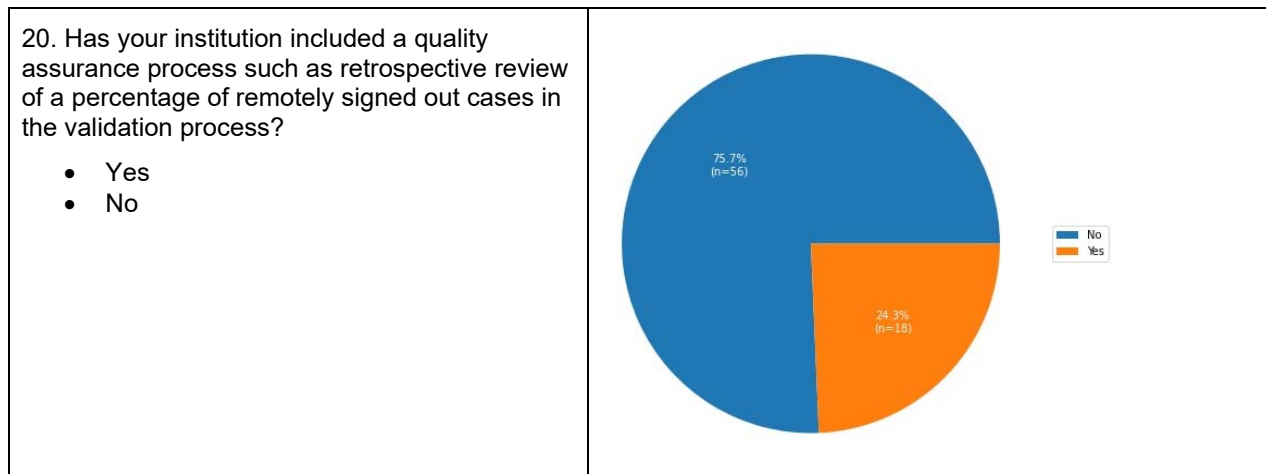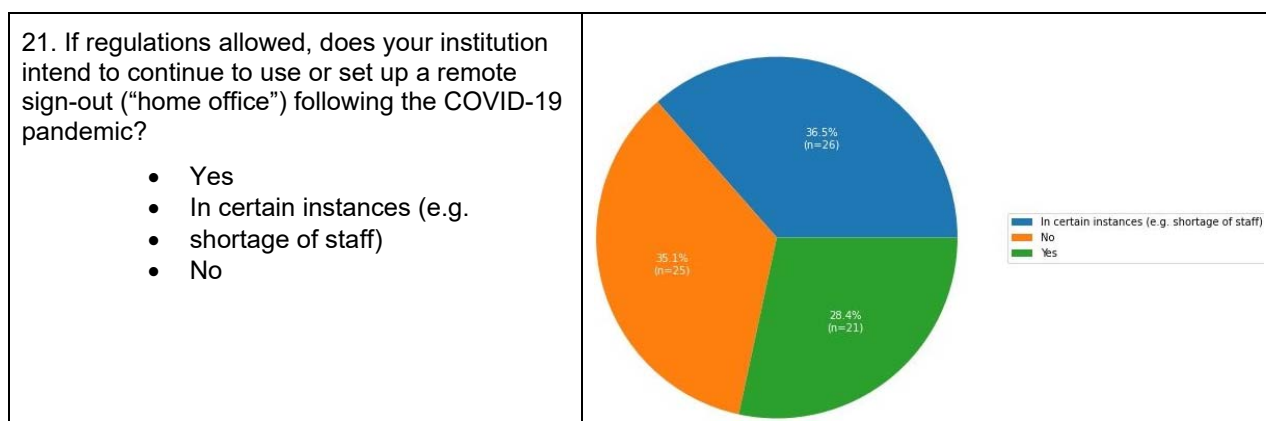

Supplement: jclinpath-2021-207768supp001_data_supplement.pdf [file jclinpath-2021-207768supp001_data_supplement.pdf]
